# THE RELIGION OF FOOLS?

Superstition Past and Present

EDITED BY S. A. SMITH  
AND ALAN KNIGHT

PAST & PRESENT SUPPLEMENT 3 2008

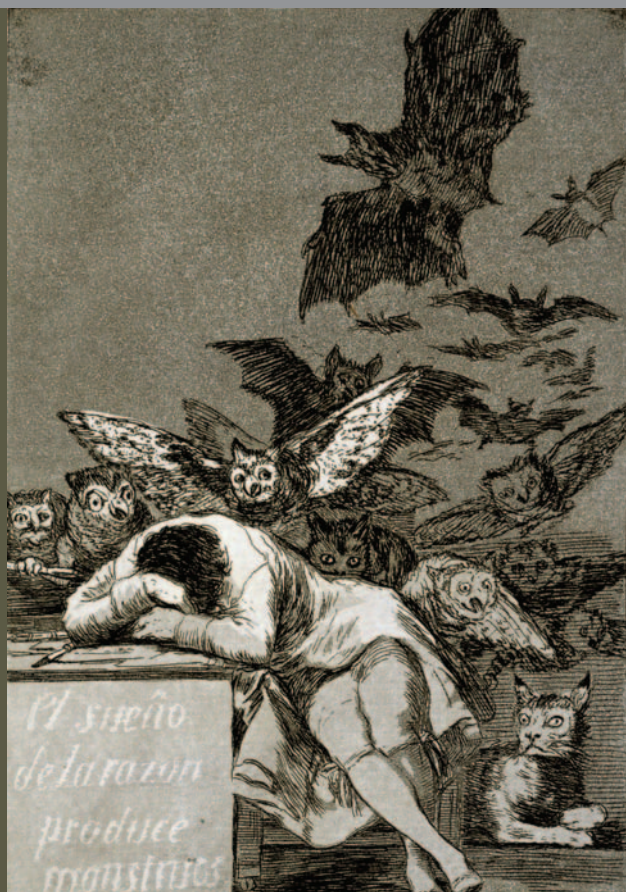

Cover image: Francisco José de Goya y Lucientes, *El sueño de la razon produce monstruos*, an etching. © The Trustees of the British Museum.  
All rights reserved.

# The Religion of Fools?

Superstition Past and Present

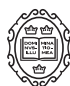

OXFORD JOURNALS  
OXFORD UNIVERSITY PRESS

# OXFORD

## UNIVERSITY PRESS

1 Great Clarendon Street, Oxford OX2 6DP

Oxford University Press is a department of the University of Oxford.  
It furthers the University's objective of excellence in research, scholarship,  
and education by publishing worldwide in

Oxford New York

Athens Auckland Bangkok Bogotá Buenos Aires Cape Town  
Chennai Dar es Salaam Delhi Florence Hong Kong Istanbul Karachi  
Kolkata Kuala Lumpur Madrid Melbourne Mexico City Mumbai Nairobi  
Paris São Paulo Shanghai Singapore Taipei Tokyo Toronto Warsaw

with associated companies in Berlin Ibadan

Oxford is a registered trade mark of Oxford University Press  
in the UK and in certain other countries

Published in the United Kingdom  
by Oxford University Press Inc., New York

© The Past and Present Society, 2008

The moral rights of the author have been asserted  
Database right Oxford University Press (maker)

First published 2008

All rights reserved. No part of this publication may be reproduced,  
stored in a retrieval system, or transmitted, in any form or by any means,  
without the prior permission in writing of Oxford University Press,  
or as expressly permitted by law, or under terms agreed with the appropriate  
reprographics rights organization. Enquiries concerning reproduction  
outside the scope of the above should be sent to the Rights Department,  
Oxford University Press, at the address above

You must not circulate this book in any other binding or cover  
and you must impose this same condition on any acquirer

A catalogue for this book is available from the British Library

Library of Congress Cataloguing in Publication  
Data (data available)

ISBN 0-19-956137-7  
ISBN 978-0-19-956137-7

Subscription information for Past & Present is available  
from: [jnls.cust.serv@oxfordjournals.org](mailto:jnls.cust.serv@oxfordjournals.org)

Typeset by Cepha Imaging Pvt Ltd, Bangalore, India  
Printed by Bell and Bain Ltd, Glasgow, UK

**Past and Present Supplements**

Supplement 3, 2008

The Religion of Fools?

Superstition Past and Present

*Edited by S. A. Smith and Alan Knight*



# The Religion of Fools?

## Superstition Past and Present

### CONTENTS

Introduction, 7

*S. A. Smith*

#### **Superstition in a Non-Christian Context**

Before Superstition and After: Theophrastus and Plutarch on *Deisidaimonia*, 56

*Hugh Bowden*

*Superstitio*, Superstition and Religious Repression in the Late Roman Republic and Principate (100 BCE–300 CE), 72

*Richard Gordon*

Superstition and its Others in Han China, 95

*T. H. Barrett*

#### **Superstition in Christendom**

Concern over Superstition in Late Medieval Europe, 115

*Michael D. Bailey*

‘Honeyed Flies’ and ‘Sugared Rats’: Witchcraft, Heresy, and Superstition in the Bresciano, 1454–1535, 134

*Stephen Bowd*

‘Superstition’, Magic, and Clerical Polemic in Seventeenth-Century Germany, 157

*Alison Rowlands*

Recording Superstition in Early Modern Britain: The Origins of Folklore, 178

*Alexandra Walsham*

Superstition in Imperial Russia, 207

*Simon Dixon*

#### **Superstition in the Modern World**

Superstition in Mexico: From Colonial Church to Secular State, 229

*Alan Knight*

*Mokoagne moni*: Sorcery and New Forms of Wealth in Cameroon, 271

*Basile Ndjio*

Imperial Secrets: Vampires and Nationhood in Puerto Rico, 290

*Lauren Derby*

Witchcraft and the State: Cameroon and South Africa. Ambiguities of ‘Reality’ and ‘Superstition’, 313

*Peter Geschiere*

List of Contributors, 336

**Index 337**

## President of the Past and Present Society

E. J. Hobsbawm

---

### Vice-Presidents

J. H. Elliott

Joan Thirsk

Keith Thomas

---

### Editorial Board (\*Members of Council)

Paul Slack

(Chairman)\*

*Linacre College, Oxford*

David Cannadine

(Vice-Chairman)\*

*IHR, University of London*

Judith Herrin

(Vice-Chairman)\*

*King's College, London*

C. A. Bayly

*St Catharine's College,  
Cambridge*

David Blackburn

*Harvard University*

Michael Braddick

*University of Sheffield*

Peter Coss

*Cardiff University*

Eric Foner

*Columbia University*

Roy Foster

*Hertford College, Oxford*

Ruth Harris\*

*New College, Oxford*

Matthew Hilton

*University of Birmingham*

Joanna Innes

*Somerville College, Oxford*

Colin Jones\*

*Queen Mary University of  
London*

Alan Knight

*St Antony's College, Oxford*

Mark Mazower

*Columbia University*

Rana Mitter

*St Cross College, Oxford*

Janet L. Nelson

*King's College, London*

Robin Osborne\*

*King's College, Cambridge*

C. H. E. Philpin

Judith Pollmann

*Inst. Geschiedenis, Leiden*

Lyndal Roper

*Balliol College, Oxford*

S. A. Smith\*

*University of Essex*

Megan Vaughan

*King's College, Cambridge*

Alexandra Walsham

*University of Exeter*

Evelyn Welch

*Queen Mary University of  
London*

Chris Wickham

*All Souls College, Oxford*

---

### Editors

Chris Wickham

Lyndal Roper

### Associate Editor

C. H. E. Philpin

### Supplement Sub-Editor

Catherine Macduff

---

Contributions and Communications (two copies), editorial correspondence, etc., should be addressed to The Editors, *Past and Present*, 175 Banbury Road, Oxford OX2 7AW, UK. Tel: +44 (0)1865 512318; Fax: +44 (0)1865 310080; E-mail: editors@pastandpresent.org.uk. Intending contributors should write for a copy of 'Notes for Contributors'.

© World Copyright: *The Past and Present Society*, 2008.

Photocopying and reprint permissions: single and multiple photocopies of extracts from this Journal may be made without charge in all public and educational institutions or as part of any non-profit educational activity, providing that full acknowledgement is made of the source. Requests to reprint in any publication for public sale should be addressed to Oxford University Press. This policy may be reviewed by the Past and Present Society from time to time. More information can be obtained from Rights and New Business Development, Journals Division, Oxford University Press, Great Clarendon Street, Oxford OX2 6DP, UK. Tel: +44 (0)1865 354490 or 353695; Fax: +44 (0)1865 353485; E-mail: journals.permission@oxfordjournals.org, www.oxfordjournals.org/access\_purchase/rights\_permissions.html

The Past and Present Society is a company limited by a guarantee registered in England under company number 2414260 and a registered charity under number 802281. Its registered office is at 9400 Garsington Road, Oxford.

Typeset by Cepha, Bangalore, India, and printed by Bell and Bain Ltd, Glasgow, UK
